# Supplementary material
Source: ML conference proceedings conference paper supplement (https://openaccess.thecvf.com/content/ICCV2025/html/Cao_UniVerse_Unleashing_the_ICCV_2025_paper.html)
Supplement: Supplementary file 1 [file Cao_UniVerse_Unleashing_the_ICCV_2025_supplemental.pdf]

# UniVerse: Unleashing the Scene Prior of Video Diffusion Models for Robust Radiance Field Reconstruction

## Supplementary Material

### 7. More Details for Method

#### 7.1. Sorting Images for Sparse Trajectory.

Starting with  $K$  poses  $\{P_i\}_{i=1}^K$ , we initialize a double linked list  $\{P_i^l\}_{i=1}^L$  with a randomly chosen pose  $P_{\text{init}} \in \{P_i\}_{i=1}^K$ , where  $L$  is the length of the list. At each iteration, for any pose  $P_c \in \{P_i\}_{i=1}^K \setminus \{P_i^l\}_{i=1}^L$ , we calculate its distance with the list  $D_{PL}$  as follows:

$$D_{PL}(P_c, \{P_i^l\}_{i=1}^L) = \min\{D_P(P_c, P_{\text{head}}^l), D_P(P_c, P_{\text{tail}}^l)\}. \quad (7)$$

Here,  $P_{\text{head}}^l$  and  $P_{\text{tail}}^l$  are the head and tail of the current list, i.e.,  $P_1^l$  and  $P_L^l$ . The distance between poses  $D_P$  is defined as:

$$D_P(P_a, P_b) = \frac{\omega_r}{s_R} \cdot D_R(R_a, R_b) + \frac{1 - \omega_r}{s_T} \cdot D_T(T_a, T_b). \quad (8)$$

Here,  $R_a$  and  $T_a$  are the rotation matrix and translation vector of the pose  $P_a$ , respectively.  $\omega_r$  is the weight for rotation distance, and  $s_R$  and  $s_T$  are scale factors to ensure rotation and translation distances have the same scale. We calculate the rotation distance  $D_R$  as:

$$D_R(R_a, R_b) = \arccos\left(\frac{\text{trace}(R_a R_b) - 1}{2}\right), \quad (9)$$

and the translation distance  $D_T$  as:

$$D_T(T_a, T_b) = \|T_a - T_b\|_2. \quad (10)$$

After calculating the distances of all  $P_c$  and  $\{P_i^l\}_{i=1}^L$ , we add the new pose  $P_{\text{new}}$  with minimal distance to the list:

$$P_{\text{new}} = \arg \min_{P_c \in \{P_i\}_{i=1}^K \setminus \{P_i^l\}_{i=1}^L} D_{PL}(P_{\text{new}}, \{P_i^l\}_{i=1}^L). \quad (11)$$

If  $P_{\text{new}}$  is closer to  $P_{\text{head}}^l$ , we add an edge from  $P_{\text{head}}^l$  to  $P_{\text{new}}$  and turn  $P_{\text{new}}$  into  $P_{\text{head}}^l$ ; otherwise, we do the same for  $P_{\text{tail}}^l$ . We iteratively perform this process until all poses in  $\{P_i\}_{i=1}^K$  are added to the list. After that, we start from  $P_{\text{head}}$  and traverse the whole list by edges to get an ordered set of poses  $\{P_i'\}_{i=1}^K$  (i.e.,  $\{P_i^l\}_{i=1}^L$ ).

According to  $\{P_i'\}_{i=1}^K$ , we obtain the ordered images  $\{I_i'\}_{i=1}^K$ . Along the ordered poses  $P_1', P_2', \dots, P_K'$ , we actually obtain an appropriate implicit camera trajectory. We show this process in both Alg. 2 and Fig. 10.

#### 7.2. Sampling Implicit Views

At each iteration, given  $N$  ordered poses  $\{P_i'\}_{i=1}^N$  and corresponding  $N$  inconsistent images  $\{I_i'\}_{i=1}^N$ , our goal now

#### Algorithm 1 UniVerse

**Input:** Inconsistent multi-view images  $\{I_i\}_{i=1}^K$ , rough camera poses  $\{P_i\}_{i=1}^K$ , camera pose estimation method  $\text{Camera}(\cdot)$ , conditional video diffusion model  $\mathcal{V}(\cdot)$ , number of images per iteration  $N$ , pose sort function  $\text{ThreadPose}(\cdot)$ , the function to turn images to initial videos  $I2V(\cdot)$ , transient occlusions segment model  $\text{Seg}(\cdot)$ , 3D Reconstruction Method  $\text{Recon}(\cdot)$

```

1: Initialization:  $I^{re'} \leftarrow \{\}$ 
    $\{I_i'\}_{i=1}^K, \{P_i'\}_{i=1}^K \leftarrow \text{ThreadPose}(\{I_i\}_{i=1}^K, \{P_i\}_{i=1}^K)$ 
    $I_{\text{sty}} \leftarrow$  manually/random choose an image from  $\{I_i'\}_{i=1}^N$ 
2: while  $K > 1$  do
3:   Initiate inpainting and style masks  $M^{\text{in}} \leftarrow \{\}, M^{\text{st}} \leftarrow \{\}$ 
4:   Extract the first  $N$  images:  $\{I_i'\}_{i=1}^N$ 
5:    $\mathbf{v}^{\text{ini}} \leftarrow I2V(\{I_i'\}_{i=1}^N, f)$ ,  $\mathbf{v}^{\text{ini}}$  refers to initial video
6:   for each frame  $v_j$  in  $\mathbf{v}^{\text{ini}}$  do
7:     if  $v_j \in \{I_i'\}_{i=1}^N$  then
8:       Mask transient occlusions:  $M_j^{\text{in}}, v_j \leftarrow \text{Seg}(v_j)$ 
9:     else
10:      Fill the inpainting mask  $M_j^{\text{in}}$  with "1"
11:    end if
12:    if  $v_j$  is  $I_{\text{sty}}$ , then
13:      Fill style mask  $M_j^{\text{st}}$  with "1".
14:    else
15:      Fill style mask  $M_j^{\text{st}}$  with "0".
16:    end if
17:     $M^{\text{in}}.\text{append}(M_j^{\text{in}}), M^{\text{st}}.\text{append}(M_j^{\text{st}})$ 
18:  end for
19:   $\mathbf{v}^{\text{re}} \leftarrow \mathcal{V}(\mathbf{v}^{\text{ini}}, M^{\text{in}}, M^{\text{st}})$ 
20:  Extract the restored images  $\{I_i^{\text{re}'}\}_{i=1}^N$  from  $\mathbf{v}^{\text{re}}$ 
21:   $I^{\text{re}'} \leftarrow I^{\text{re}'} \cup \{I_i^{\text{re}'}\}_{i=1}^N$ 
22:   $I_{\text{sty}} \leftarrow I_N^{\text{re}'}$ 
23:   $\{I_i'\}_{i=1}^K \leftarrow \{I_i'\}_{i=N+1}^K, K \leftarrow \max(K - N, 0)$ 
24:   $\{I_i'\}_{i=1}^K \leftarrow \{I_N^{\text{re}'}\} \cup \{I_i'\}_{i=1}^K$ 
25:  Update  $K \leftarrow K + 1$ 
26: end while
27: # now we get consistent images  $I^{\text{re}'}$  (i.e.  $\{I_i^{\text{re}'}\}_{i=1}^K$ )
28:  $\{P_i'\}_{i=1}^K \leftarrow \text{Camera}(I^{\text{re}'})$  # estimate poses again using consistent images
29: Output: the reconstructed 3D scene  $\text{Recon}(I^{\text{re}'}, \{P_i'\}_{i=1}^K)$ 

```

is to create a initial video of  $f$  frames including all the input  $N$  images. And we inflate it to  $f$  frames by sampling

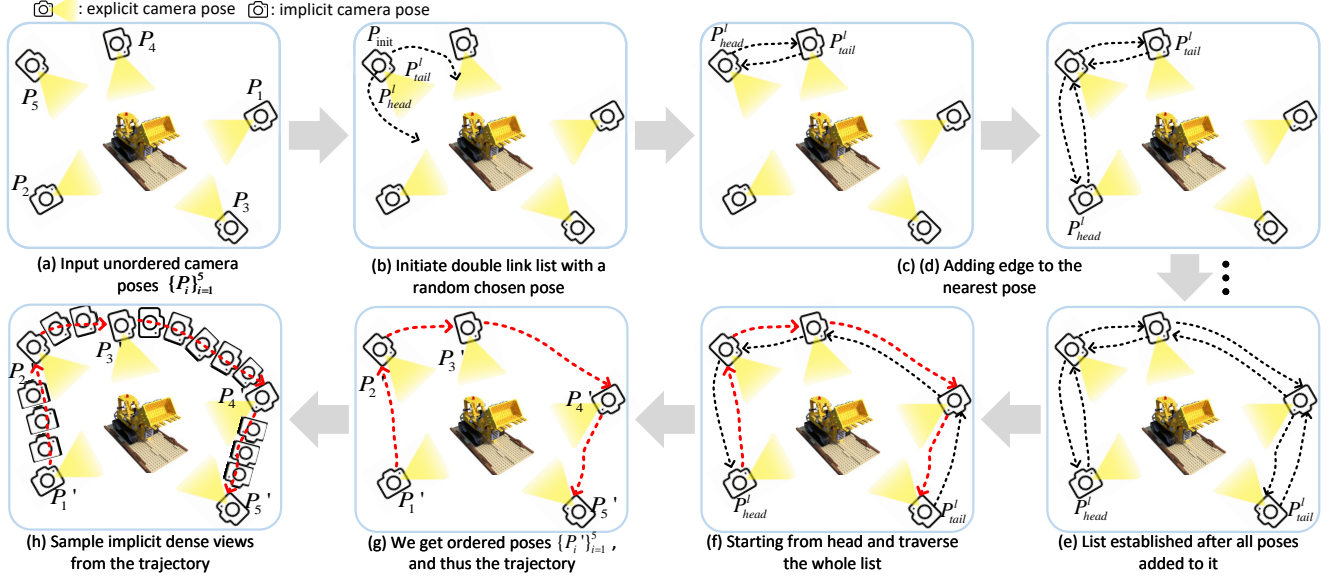

Figure 10. The flowchart of how we transform a set of multi-view images into a initial video. Here we take an example with 5 input images and their poses. Given 5 unordered poses shown in (a), we firstly random choose a pose to initiate a double link list in (b). Next, we iteratively add the nearest pose to the list until all poses are in the list, shown in (c)(d)(e). Then in (f) we start from the head of the list and traverse the whole list and obtain the ordered poses in (g). Finally we add new poses to the intervals of input poses, making the trajectory dense and thus transform images to video.

#### Algorithm 2 ThreadPose for Implicit Camera Trajectory

**Input:** Poses  $\{P_i\}_{i=1}^K$ ,  $add\_edge(\cdot)$  func to add bidirectional edges,  $Traverse(\cdot)$  func to traverse the list by edges

- 1: Initialize a double linked list  $\{P_i^l\}_{i=1}^L$  with a randomly chosen pose  $P_{init} \in \{P_i\}_{i=1}^K$
- 2: Set  $L \leftarrow 1$ ,  $P_1^l \leftarrow P_{init}$
- 3: **while**  $\{P_i\}_{i=1}^K \setminus \{P_i^l\}_{i=1}^L$  is **not empty** **do**
- 4: Find the pose  $P_{new}$  with the minimal distance:

$$P_{new} = \arg \min_{P_c \in \{P_i\}_{i=1}^K \setminus \{P_i^l\}_{i=1}^L} D_{PL}(P_{new}, \{P_i^l\}_{i=1}^L)$$

- 5: **if**  $D_P(P_{new}, P_{head}^l) < D_P(P_{new}, P_{tail}^l)$  **then**
- 6:  $P_{head}^l.add\_edge(P_{new})$
- 7:  $P_{head}^l \leftarrow P_{new}$
- 8: **else**
- 9:  $P_{tail}^l.add\_edge(P_{new})$
- 10:  $P_{tail}^l \leftarrow P_{new}$
- 11: **end if**
- 12:  $L \leftarrow L + 1$
- 13: **end while**
- 14:  $\{P_i^l\}_{i=1}^K \leftarrow Traverse(P_{head}^l)$
- 15: **Output:** Ordered poses  $\{P_i^l\}_{i=1}^K$

the distances  $\{d_i\}_{i=1}^{N-1}$  between neighboring poses:

$$d_i = D_P(P_i^l, P_{i+1}^l), \quad i = 1, 2, \dots, N-1. \quad (12)$$

Next, we determine the number of new poses  $n_i$  to be inserted between each pair of neighboring poses  $P_i^l$  and  $P_{i+1}^l$ , proportional to the distance  $d_i$ :

$$n_i = \left\lfloor \frac{d_i}{\sum_{i=1}^{N-1} d_i} \times (f - N) \right\rfloor, \quad i = 1, 2, \dots, N-1, \quad (13)$$

where  $\lfloor x \rfloor$  denotes the floor function, which gives the greatest integer  $\leq x$ . Since the sum of  $n_i$  might not exactly equal  $f - N$  due to the floor operation, we distribute the remaining poses. We calculate the remaining number of poses  $r$ :

$$r = (f - N) - \sum_{i=1}^{N-1} n_i. \quad (14)$$

Then, we add one additional pose to the  $r$  largest intervals (i.e., the intervals with the largest  $d_i$  values) by incrementing  $n_i$  for the  $r$  largest  $d_i$  values:

$$n_i = n_i + \begin{cases} 1 & \text{if } d_i \text{ is among the } r \text{ largest values,} \\ 0 & \text{otherwise.} \end{cases} \quad (15)$$

In this way, we obtain the number of inserted views. By inserting  $n_i$  zero frames into neighboring images  $I_i^l, I_{i+1}^l$ , we get the initial video.

$f - N$  new poses and thus new views. First, we compute

## 8. More Implementation Details

**Adapt Video Diffusion Models with Mask Input:** We fine-tune the Video Diffusion Model from the  $576 \times 1024$  interpolation model of ViewCrafter [67]. Since our method utilizes additional masks (*i.e.* inpainting masks and style masks), we need to change the input dimension of the Denoising U-Net. We follow the fine-tuning approach of Inpainting Latent Diffusion [37]. Specifically, we change an  $8 \times C \times kernel\_size \times kernel\_size$  2D convolutional kernel to  $10 \times C \times kernel\_size \times kernel\_size$  by concatenating two additional masks. To do this, we maintain the original  $8 \times C \times kernel\_size \times kernel\_size$  kernels and add zero-initialized  $2 \times C \times kernel\_size \times kernel\_size$  kernels to it.

**Detect All Transient Objects in Input Images:** In the UniVerse pipeline, it is important to identify all transient objects to mask them. To achieve this, we first pre-define a set of transient prompts, such as [person, car, bike]. We then use a Semantic Segmentation Model to detect the pixels of the objects in the prompts. Using the positions of these pixels, we employ the Segment Anything Model (SAM) [24] to precisely segment the objects and obtain the inpainting masks.

## 9. More Visual Results

Since UniVerse utilizes a VDM to turn initial videos into restored videos, we present several examples in Figs. 11, 12, and 13, demonstrating how UniVerse leverages the video prior to transform multi-view images into a consistent video. In these figures, the top row shows the initial video frames, while the bottom row displays the corresponding restored video frames. The frames are arranged from left to right in sequential order, with the first row showing frames 1-5, the second row showing frames 6-10, and so on.



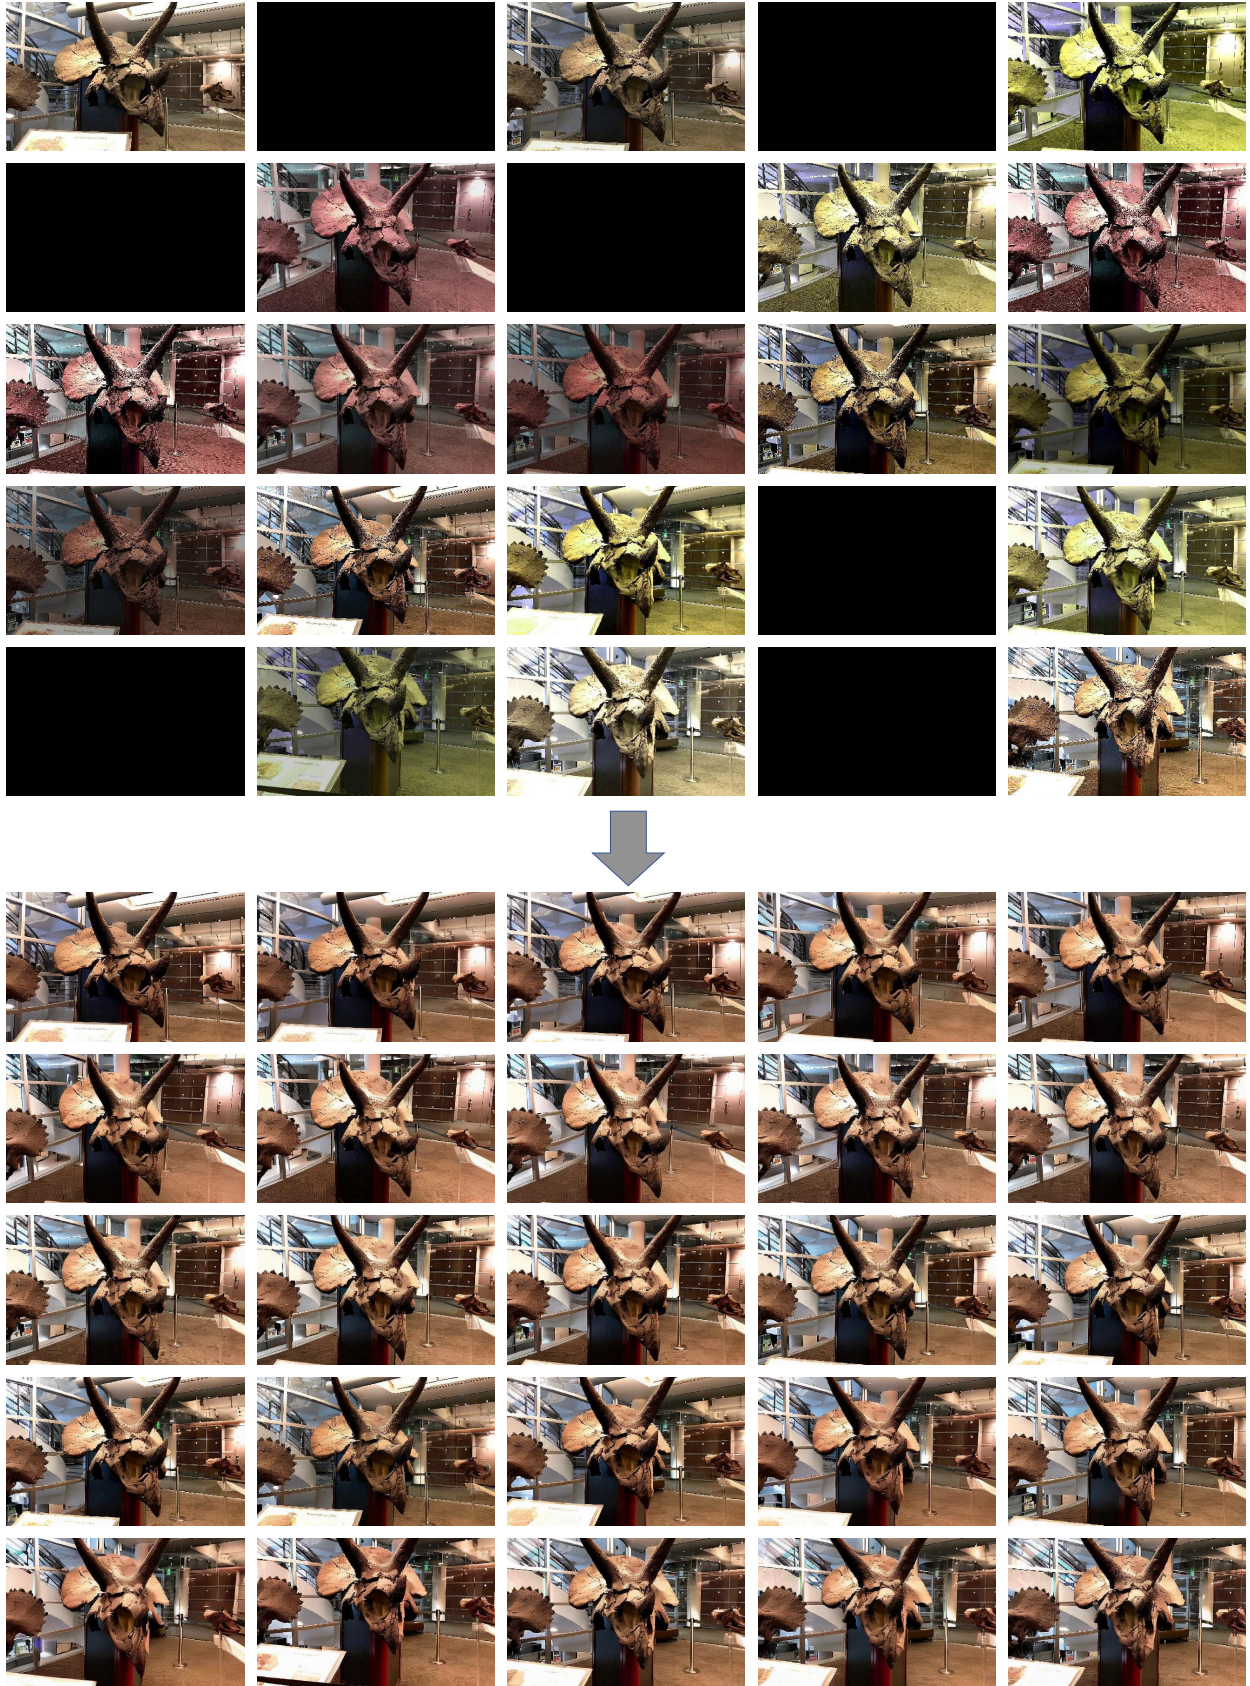

Figure 11. Visualization of how UniVerse turns a initial video into restored video.



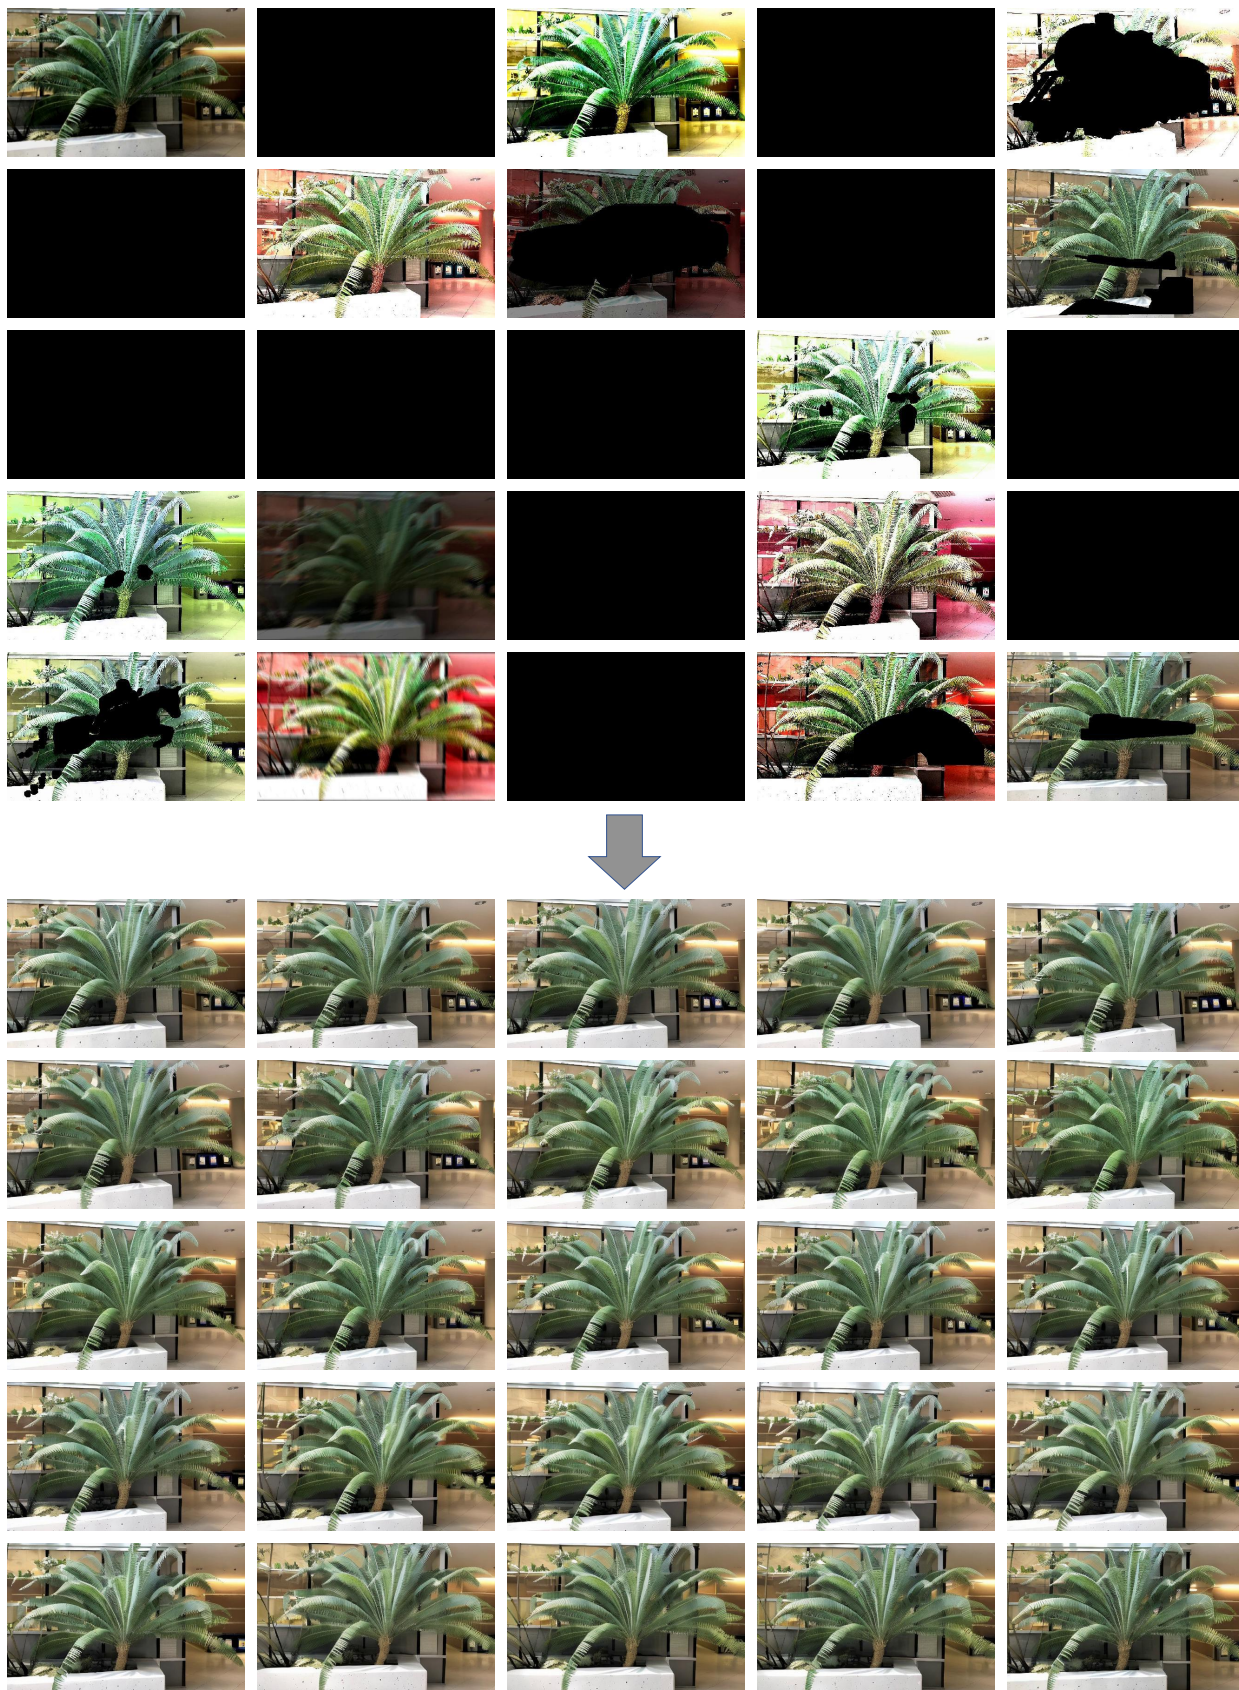

Figure 12. Visualization of how UniVerse turns a initial video into restored video.



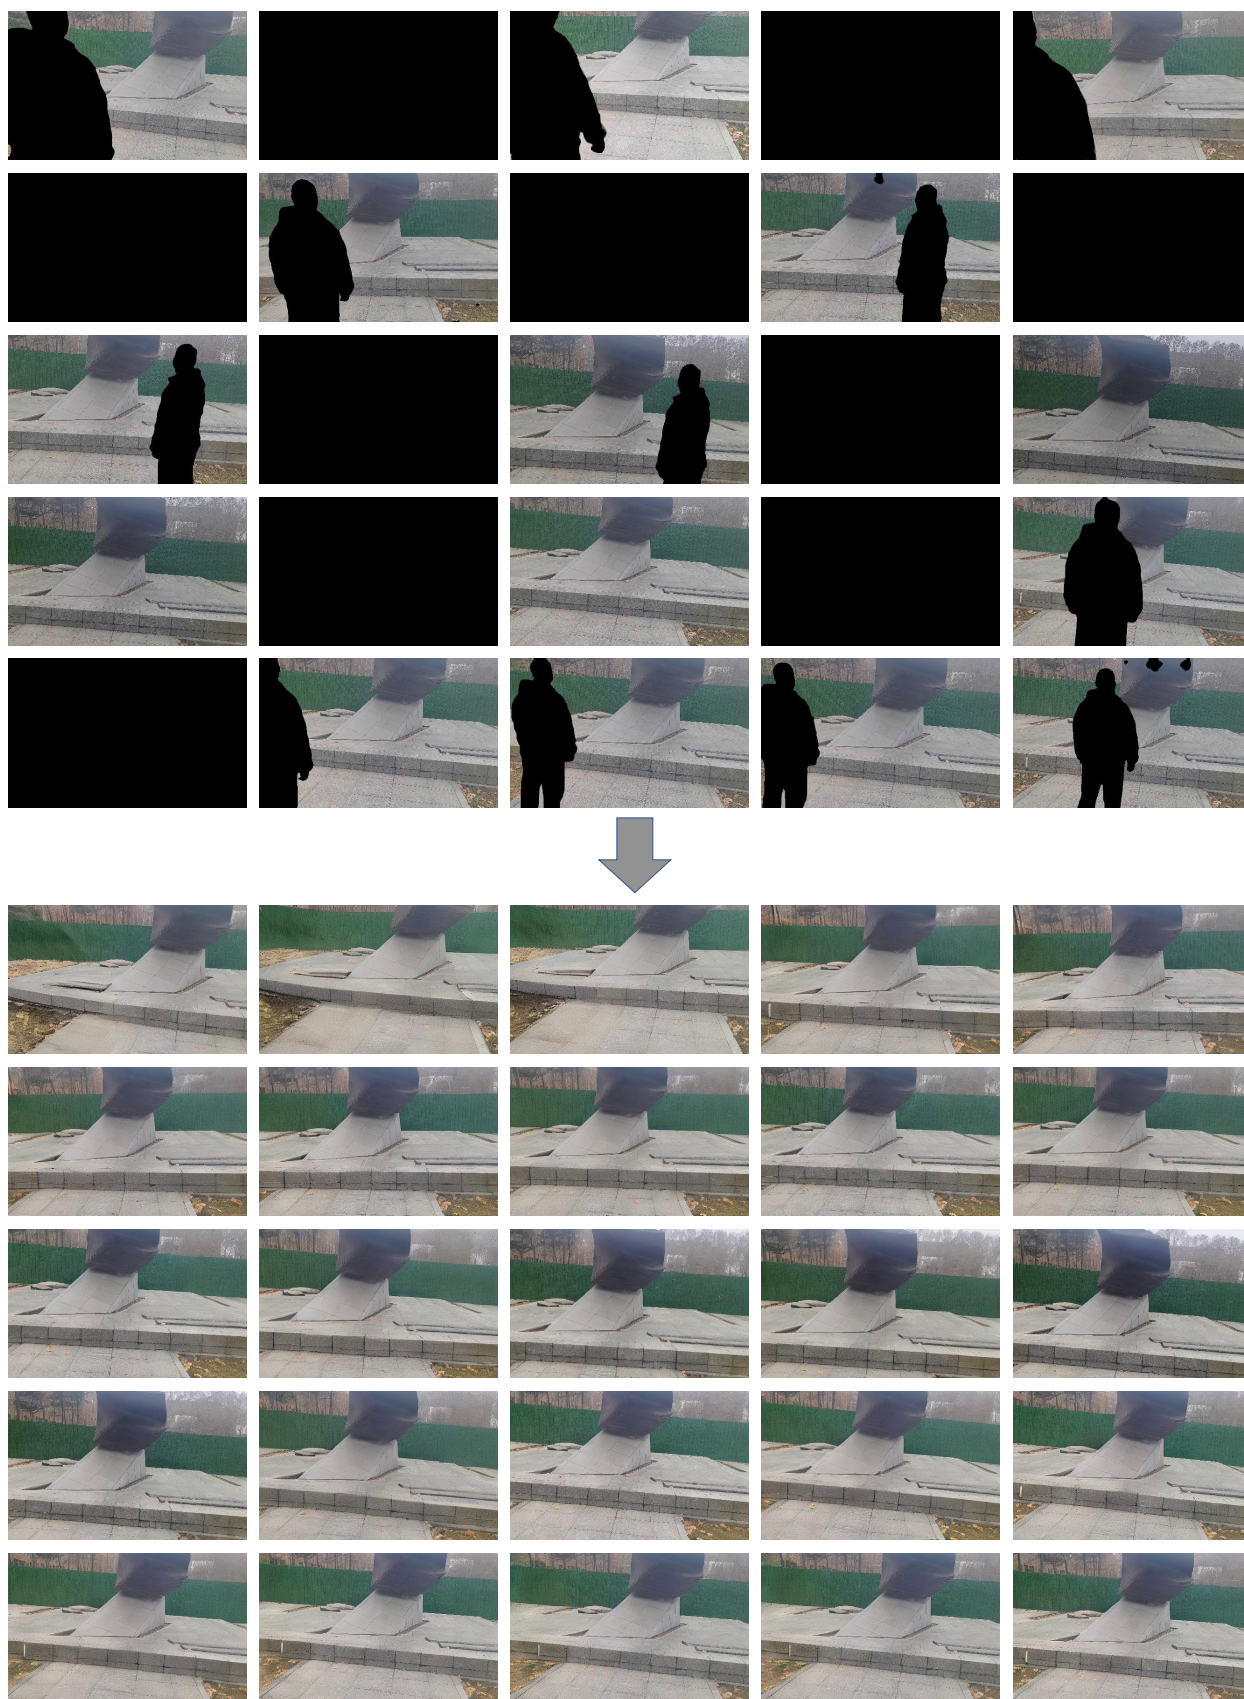

Figure 13. Visualization of how UniVerse turns a initial video into restored video.
